# Supplementary material for: Phase behavior of main-chain liquid crystalline polymer networks synthesized by alkyne–azide cycloaddition chemistry
Source: Royal Society of Chemistry journal article supplement (doi:10.1039/c8sm01913d), 2018-01-01
Supplement: c8sm01913d1.pdf [file c8sm01913d1.pdf]

### Supplementary Information

Phase behavior of main-chain liquid crystalline polymer networks synthesized by alkyne-azide cycloaddition chemistry

*Yongjian Wang<sup>a</sup> and Kelly A. Burke<sup>a,b,c\*</sup>*

<sup>a</sup>Chemical and Biomolecular Engineering, University of Connecticut, 191 Auditorium Road Unit 3222, Storrs, CT 06269-3222

<sup>b</sup>Polymer Program, Institute of Materials Science, University of Connecticut, 97 North Eagleville Road Unit 3136, Storrs, CT 06269-3136

<sup>c</sup>Biomedical Engineering, University of Connecticut, 260 Glenbrook Road Unit 3247, Storrs, CT 06269-3247

## Differential Scanning Calorimetry and POM of Monomers

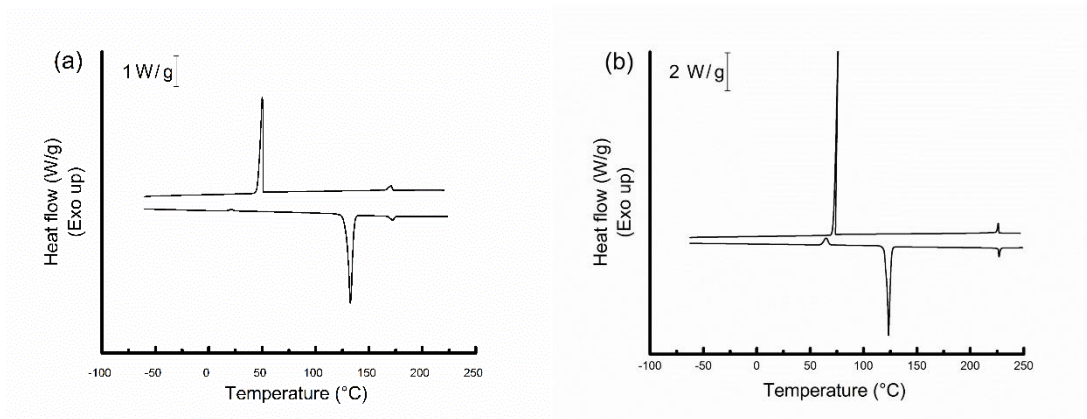

**Figure S1.** Second heating and second cooling differential scanning calorimetry (DSC) traces of (a) **5yMe** and (b) **5yH** monomer.

The second heating trace for **5yMe** (Figure S1.a) shows a small recrystallization exotherm peak at 22°C, and two endothermic valleys at 133°C and 172°C due to the melting and the LC-to-isotropic transitions, respectively. Upon cooling, **5yMe** shows two exothermic peaks, with one at 171°C due to the isotropic-to-LC transition and the other at 50°C due to crystallization. The second heating trace for **5yH** (Figure S1.b) shows a recrystallization exotherm at 65°C, and two endothermic valleys at 123°C and 227°C due to the melting and the LC-to-isotropic transitions, respectively. Like **5yMe**, **5yH** shows two exothermic peaks on the cooling trace, with one at 226°C due to the isotropic-to-LC transition and the other at 76°C due to crystallization.

## POM of Monomers

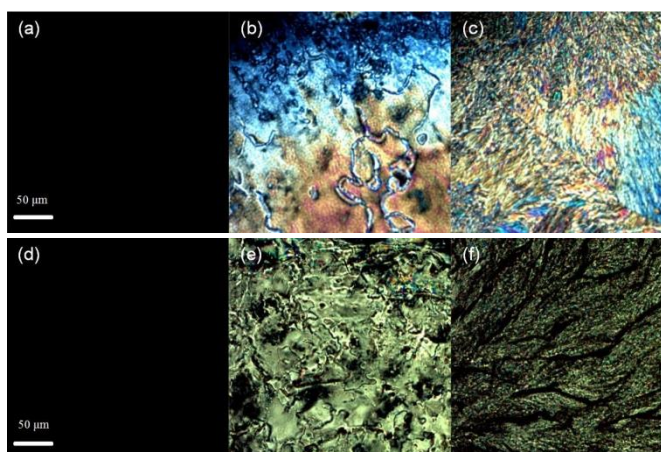

**Figure S2.** Polarized optical microscopy (POM) images of **5yMe** cooled from the isotropic melt at 10°C/min at the following temperatures: (a) 170°C, (b) 100°C, and (c) 15°C. POM images of **5yH** cooled from the isotropic melt at the same rate at the following temperatures: (c) 220°C, (d) 190°C, and (e) 20°C.

### DSC traces of 5yTe films

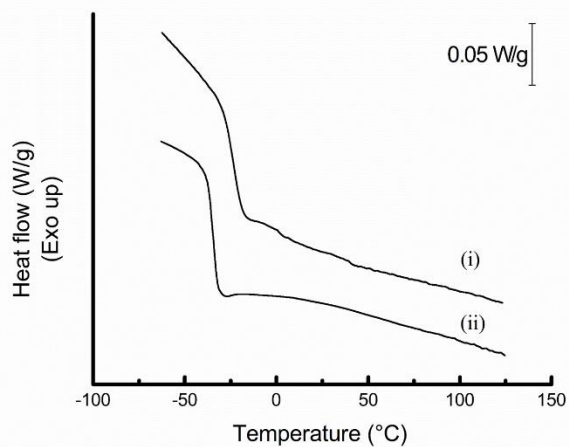

**Figure S3.** Second heating DSC traces of **5yTe** films: (i) **N-5yTe<sub>6</sub>-PEO3<sub>4</sub>**, (ii) **N-5yTe<sub>6</sub>-PPO7<sub>4</sub>**

### First Heating DSC traces of 5yMe films

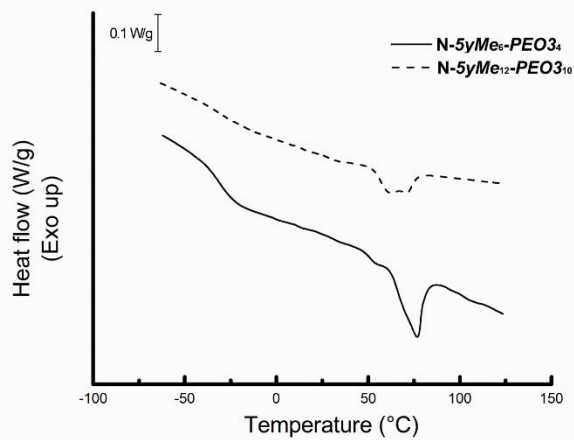

**Figure S4.** First heating DSC traces of **N-5yMe<sub>6</sub>-PEO3<sub>4</sub>** and **N-5yMe<sub>12</sub>-PEO3<sub>10</sub>**. The heating trace of **N-5yMe<sub>6</sub>-PEO3<sub>4</sub>** showed an endothermic valley at 76.8°C and the heating trace of **N-5yMe<sub>12</sub>-PEO3<sub>10</sub>** showed an endothermic valley at 66.3°C.

**DSC and DMA Data of N-5yMe<sub>6</sub>-PPO7<sub>4</sub>**

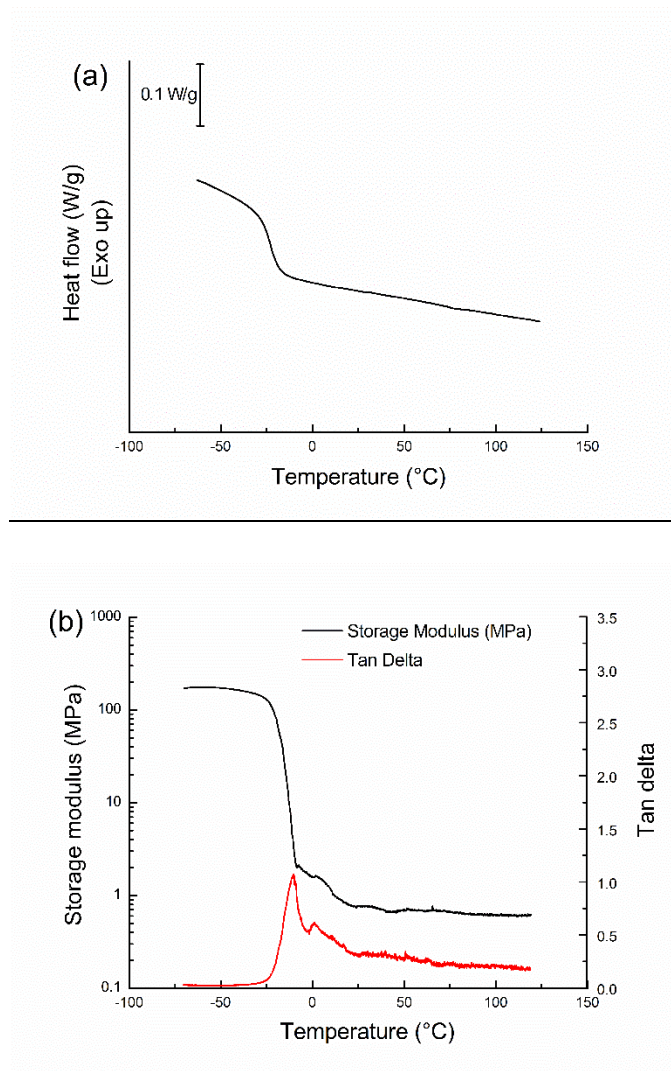

**Figure S5.** (a) DSC and (b) DMA data of **N-5yMe<sub>6</sub>-PPO7<sub>4</sub>**.

## Additional DMA Traces of Networks

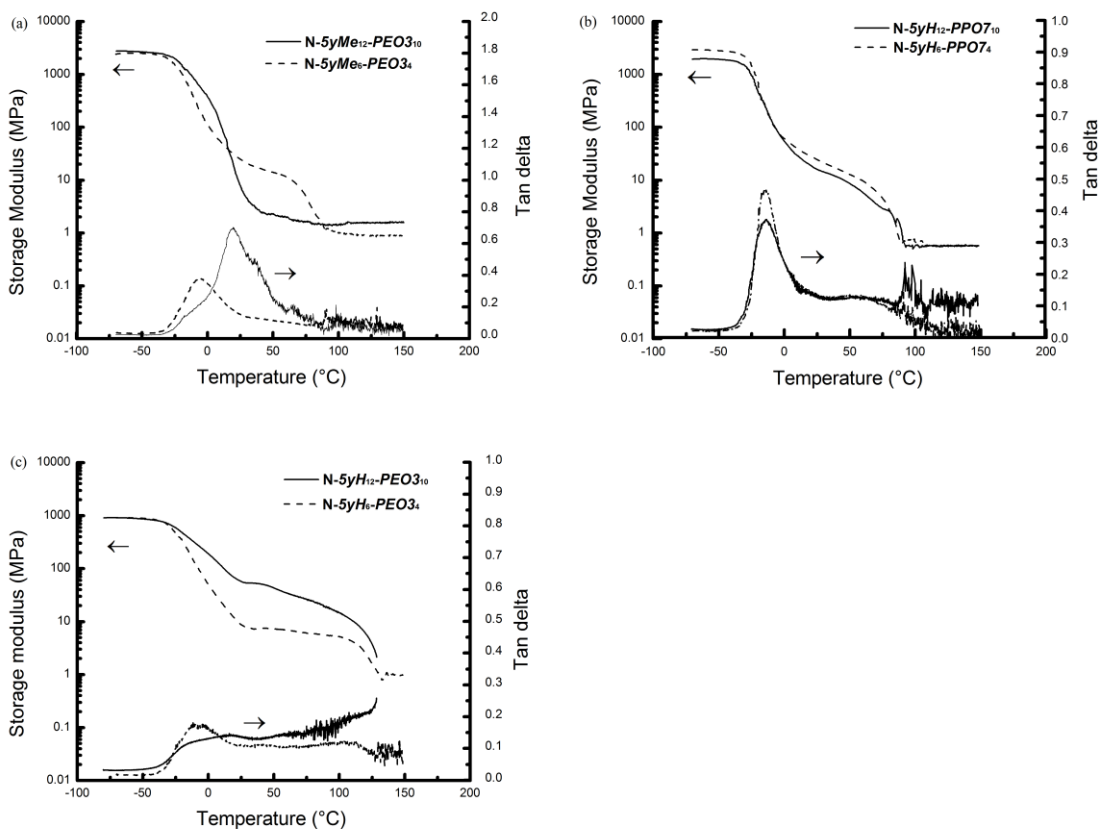

**Figure S6.** Comparison of different crosslink density using dynamic mechanical analysis. (a) DMA trace of 5yMe-PEO3 network films, and (b) DMA traces of 5yH-PPO7 network films. (c) DMA trace of 5yH-PEO3 network films.

## DSC Traces of Linear Polymers

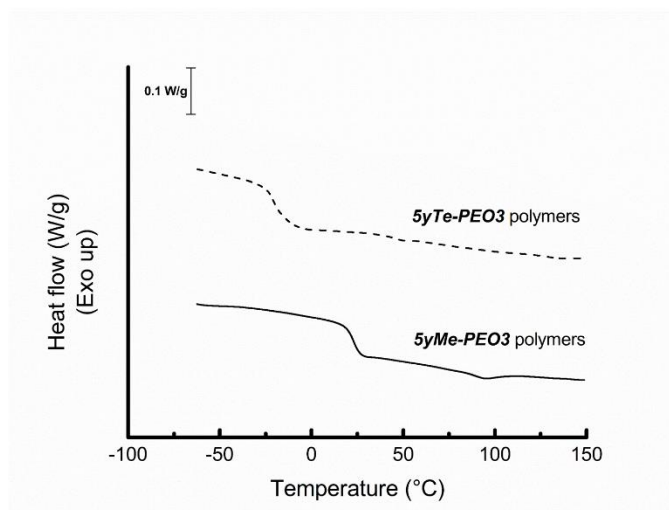

**Figure S7.** Second heating DSC trace of **5yMe-PEO3** polymers. Glass transition of **5yMe-PEO3** polymers is at 23°C. Glass transition of **5yTe-PEO3** polymers is at -20.6°C.

**DMA of N-5yTe<sub>6</sub>-PPO7<sub>4</sub>**

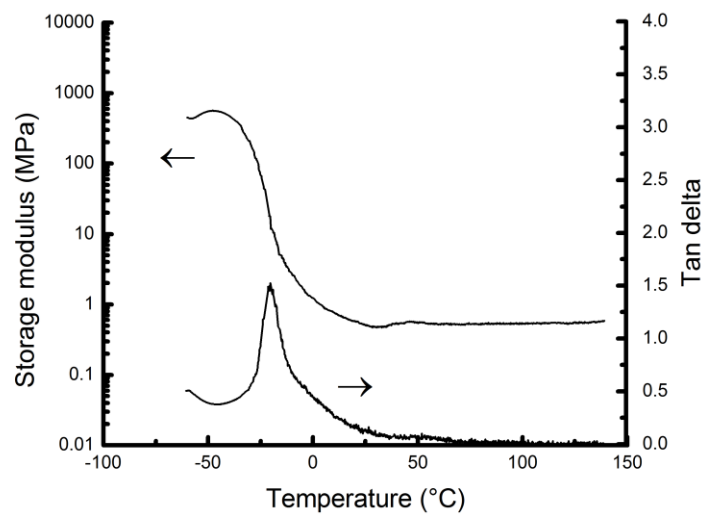

**Figure S8.** Tensile storage modulus and tan delta as a function of temperature for N-5yTe<sub>6</sub>-PPO7<sub>4</sub>.

**Actuation of  $N-5yMe_{12}-PEO3_{10}$**

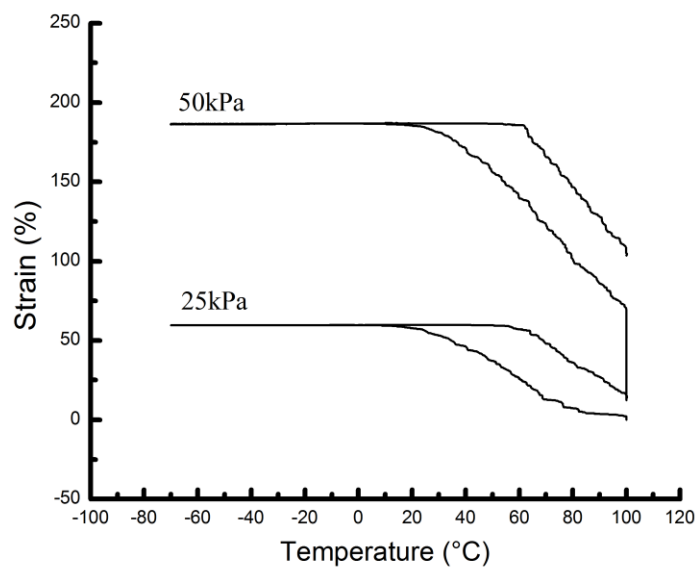

**Figure S9.** Actuation (two-way shape memory cycles) of  $N-5yMe_{12}-PEO3_{10}$  using controlled force DMA.



**Actuation of N-5yMe<sub>6</sub>-PEO<sub>3</sub><sub>4</sub>, N-5yH<sub>6</sub>-PEO<sub>3</sub><sub>4</sub>, N-5yH<sub>6</sub>-PPO<sub>7</sub><sub>4</sub>, and N-5yH<sub>12</sub>-PEO<sub>3</sub><sub>10</sub>**

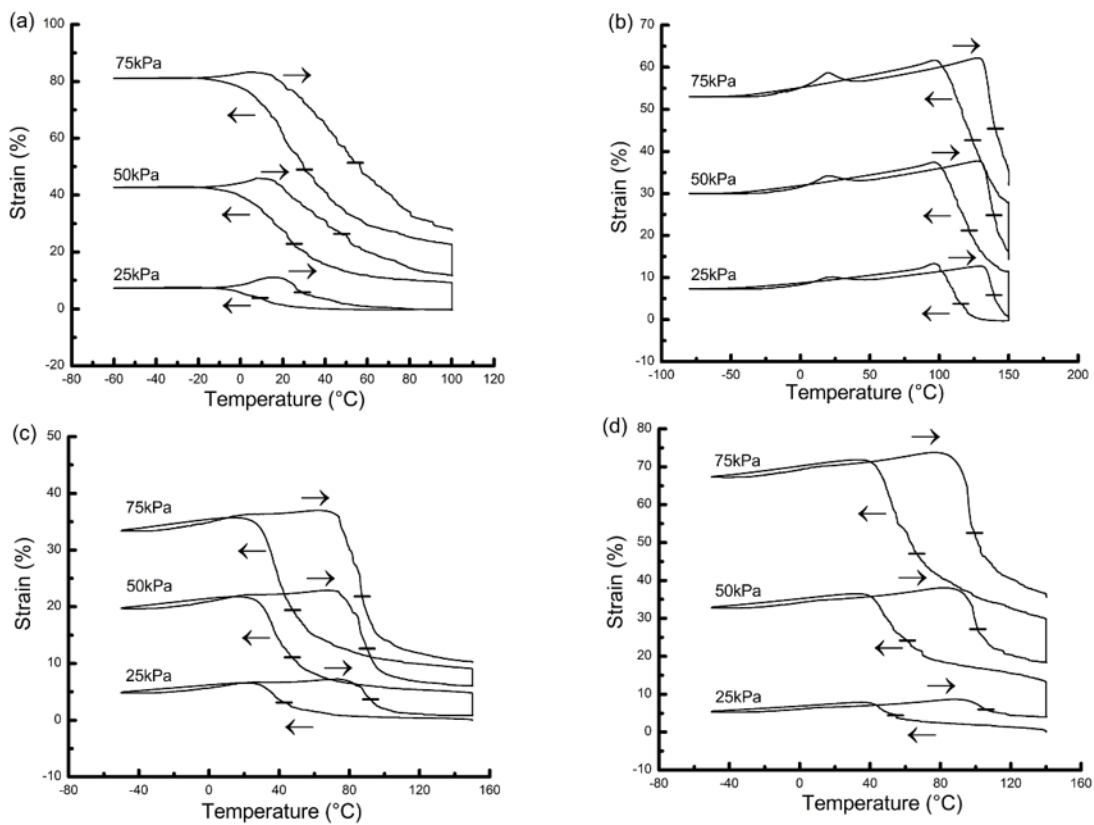

**Figure S10** Actuation (two-way shape memory cycles) of LCNs measured by DMA in controlled force mode. (a) N-5yMe<sub>6</sub>-PEO<sub>3</sub><sub>4</sub> (b) N-5yH<sub>6</sub>-PEO<sub>3</sub><sub>4</sub> (c) N-5yH<sub>6</sub>-PPO<sub>7</sub><sub>4</sub> (d) N-5yH<sub>12</sub>-PEO<sub>3</sub><sub>10</sub>. Intersection of horizontal tick marks with the traces indicate half actuation strain.

### Room Temperature SAXS of LCNs

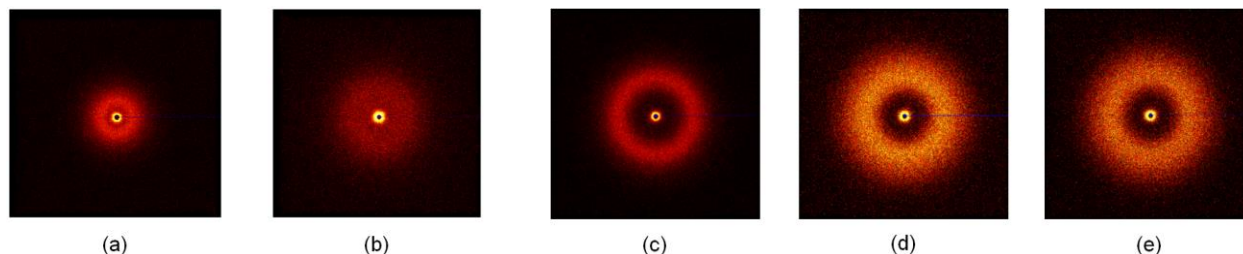

**Figure S11.** 2D SAXS patterns acquired at room temperature of: (a) **N-5yMe<sub>6</sub>-PEO<sub>34</sub>**, (b) **N-5yMe<sub>12</sub>-PEO<sub>310</sub>**, (c) **N-5yH<sub>6</sub>-PEO<sub>34</sub>**, (d) **N-5yH<sub>6</sub>-PPO<sub>74</sub>**, and (e) **N-5yH<sub>12</sub>-PPO<sub>710</sub>**.

The SAXS patterns of **N-5yMe<sub>6</sub>-PEO<sub>34</sub>** (Fig. S10a) and **N-5yMe<sub>12</sub>-PEO<sub>310</sub>** (Fig. S10b) show one broad halo, indicating both networks display long-range ordering, but that there is no overall alignment to this structure. This was again expected for the polydomain networks. These halos are centered at  $q=0.054 \text{ \AA}^{-1}$  ( $d=11.57 \text{ nm}$ ) for **N-5yM<sub>6</sub>-PEO<sub>34</sub>** and  $q=0.064 \text{ \AA}^{-1}$  ( $d=9.76 \text{ nm}$ ) for **N-5yMe<sub>12</sub>-PEO<sub>310</sub>** are thought to be related to the aggregation of liquid crystals. The SAXS patterns of **5yH** networks synthesized with **PEO<sub>3</sub>** and **PPO<sub>7</sub>** also show bright halos centered at  $q=0.082 \text{ \AA}^{-1}$  ( $d=7.66 \text{ nm}$ ) for **N-5yH<sub>6</sub>-PEO<sub>34</sub>** (Fig. S10c) and  $q=0.083 \text{ \AA}^{-1}$  ( $d=7.57 \text{ nm}$ ) for **N-5yH<sub>6</sub>-PPO<sub>74</sub>** and **N-5yH<sub>12</sub>-PPO<sub>710</sub>** networks (Fig. S10d and S10e) suggesting that these materials also have longer-range order, but that this is over a shorter distance than the **5yMe** networks.

### WAXS of Stretched *5yH* Networks

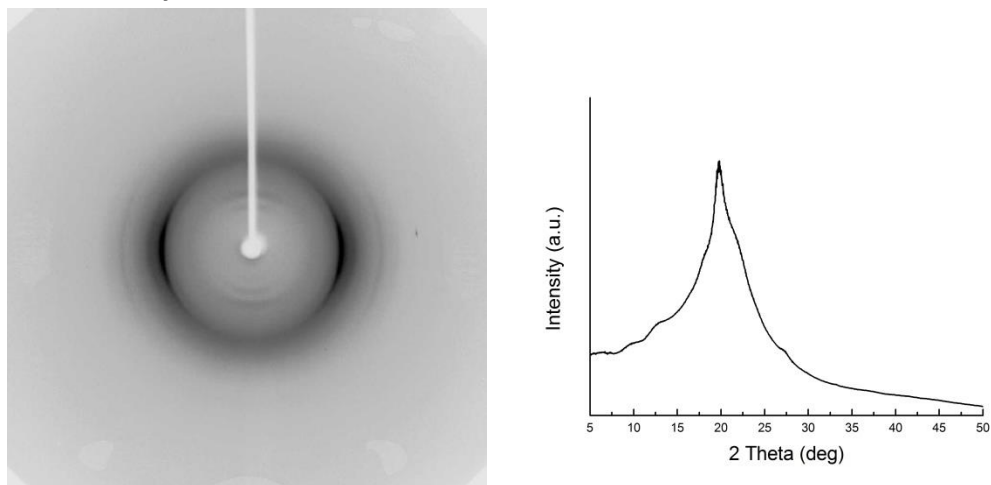

Figure S12. 2D WAXS pattern and 1D WAXS plot of stretched **N-5yH<sub>6</sub>-PPO7<sub>4</sub>** (65% strain).

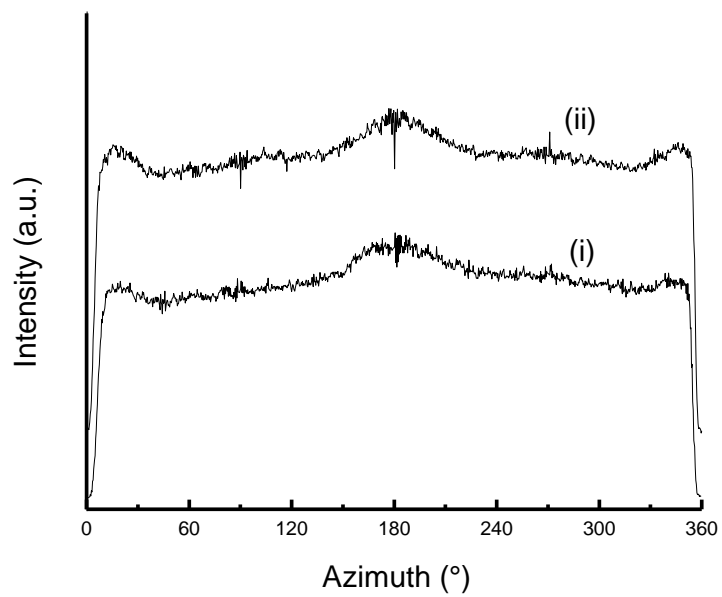

Figure S13. Azimuthal scan of stretched **N-5yH<sub>6</sub>-PPO7<sub>4</sub>** (65% strain): (i)  $2\theta$  at  $9.3^\circ$  (ii)  $2\theta$  at  $12.35^\circ$ .

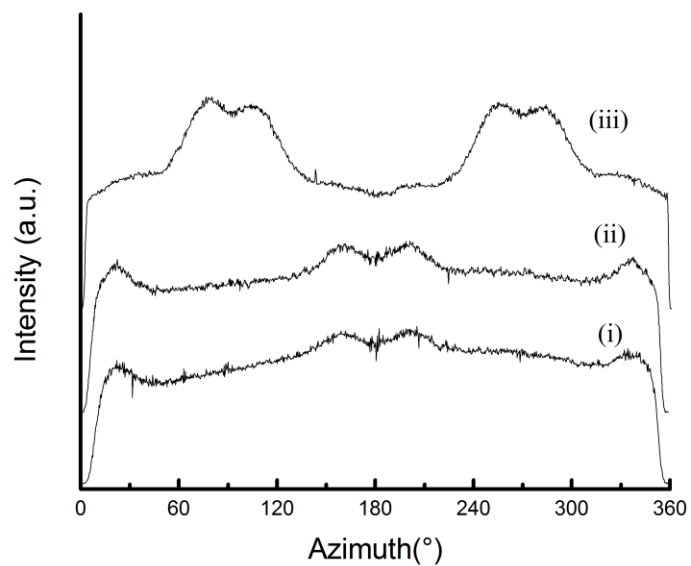

**Figure S14.** Azimuthal scan of stretched **N-5yH<sub>6</sub>-PEO<sub>3</sub><sub>4</sub>** (60% strain): (i)  $2\theta$  at  $6.50^\circ$  (ii)  $2\theta$  at  $8.96^\circ$  (iii)  $2\theta$  at  $27.2^\circ$ .

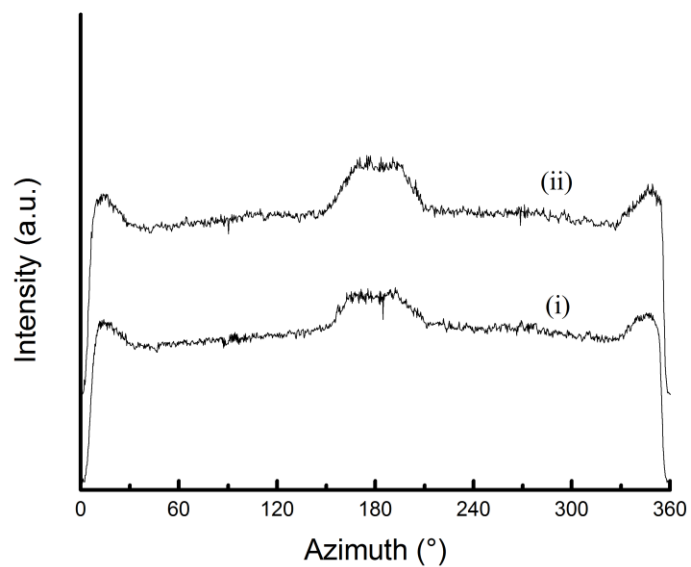

**Figure S15.** Azimuthal scan of stretched **N-5yH<sub>12</sub>-PPO<sub>7</sub><sub>10</sub>** (140% strain): (i)  $2\theta$  at  $9.71^\circ$  (ii)  $2\theta$  at  $12.52^\circ$ .
